# Supplementary material
Source: HighWire-hosted journal article supplement (https://n.neurology.org/content/suppl/2011/12/20/WNL.0b013e31822b007a)
Supplement: stewart.pdf [file stewart.pdf]

## β-受体阻滞剂的选择性对血压波动和脑卒中的作用

### Effects of β-blocker selectivity on blood pressure variability and stroke

A systematic review

Alastair John Stewart  
Webb, BMBCh  
Urs Fischer, MD  
Peter Malcolm Rothwell,  
FMedSci

Address correspondence  
to Prof. P.M. Rothwell,  
Stroke Prevention Research Unit,  
Department of Clinical Neurology,  
John Radcliffe Hospital, Heading-  
ton,  
Oxford OX3 9DU, UK  
peter.rothwell@clneuro.ox.ac.uk

#### 摘要

目标: β受体阻滞剂会提高收缩压的波动, 因此与其他药物相比, 对于脑卒中的预防作用低于心肌梗塞的预防。这一血压波动的增加或许可作为特定的非心血管选择药物的标记, 因此可能对在偏头痛先兆、老年人出现特发性震颤或焦虑, 以及其他卒中风险等情况下广泛采用心得安作为一线药物提出质疑。

方法: 通过针对不同类型β受体阻滞剂与安慰剂或其他药物的随机对照试验的系统回顾分析, 观察β受体阻滞剂对于血压波动性和脑卒中风险的亚作用。此外还联合评估了在人群中对于血压波动(方差比, ratio of the variances [VR]), 卒中风险和心肌梗塞的效果。

结果: 与其他抗高血压药物相比, 使用非选择性β受体阻滞剂后收缩压(SBP)波动(VR=1.34, 1.13-1.59,  $P=0.002$ , 25组比较, 9992例患者)明显大于β1选择性受体阻滞剂(VR=1.09, 95% CI 1.00-1.09,  $P=0.053$ , 68组比较, 40746例患者, difference- $P=0.038$ )。β1选择性受体阻滞剂与非选择性β受体阻滞剂直接比较时, β1选择性受体阻滞剂组的SBP波动也显著降低(VR=0.81, 0.68-0.97,  $P=0.03$ , 18组比较, 954例患者)。与其他抗高血压药物相比, 使用非选择性β受体阻滞剂(OR=2.29, 1.32-3.96,  $P=0.002$ )相比β1选择性受体阻滞剂(OR=1.24, 1.08-1.42,  $P=0.003$ , difference- $P=0.03$ )会增加卒中风险, 与心肌梗塞相关的卒中风险也增加[OR=1.50(0.93-2.42) VS 0.99 (0.82-1.19)]。

结论: 当有脑卒中风险的患者使用β受体阻滞剂时, 更推荐采用选择性β1受体阻滞剂而不是非选择性受体阻滞剂。

NEUROLOGY 2011;77:731-737 刘佳译, 周涌涛校

#### 缩略词

BP= 血压; CI= 可信区间; DBP= 舒张压; MI= 心肌梗塞; MRC= 医学研究中心; OR= 风险比; RCT= 随机控制实验; rOR= 相对风险比; SBP= 收缩压; VR= 方差比

血压波动增加会导致脑卒中的风险增加, 该风险与血压均值无关<sup>[1,2]</sup>。最近的研究显示β受体阻滞剂会使血压波动性增加<sup>[3-5]</sup>, 从而可能缺乏对脑卒中的有效预防<sup>[1-5]</sup>。β受体阻滞剂家族具有多种生理学效应, 包括不同程度的α、β1、β2活性以及非肾上腺素样作用<sup>[6]</sup>。像心得安类非选择性β受体阻滞剂相比选择性β1受体阻滞剂而言, 对外周抵抗程度更明显, 从而导致血压波动增加。事实上, 心得安是应用广泛的心血管药物; 选择性β1受体阻滞剂在治疗心肌梗塞<sup>[7,8]</sup>、心绞痛<sup>[9]</sup>、心律失常<sup>[10]</sup>以及心衰<sup>[11]</sup>中作为优先用药。然而, 心得安仍在先兆偏头痛<sup>[11,12]</sup>、焦虑和老年人的原发性震颤<sup>[13]</sup>以及一些常见的神经科治疗中广泛使用<sup>[14,15]</sup>。

因此我们提出这样的观点, 即选择性β1受体阻滞剂与心得安和其他非选择性β受体阻滞剂相比, 具有减少收缩压波动的作用, 因而对需要服用β受体阻滞剂且有卒中风险的患者更安全。为此, 我们对报告比较β受体阻滞剂和安慰剂、其他抗高血压药或其他β受体阻滞剂亚组的随机对照试验进行了系统回顾和荟萃分析。

#### 方法

##### 研究策略

在Medline和Cochrane数据库(1950年至2009年7月1日)中, 采用以前文章提及的方式<sup>[6]</sup>, 以下检索词联合检索的方式: (“meta[analysis]”) and (“antihypertensive” or “blood[pressure lowering]”)。非

From the Stroke Prevention Research Unit, Department of Clinical Neurology, University of Oxford, Oxford, UK.

Study funding: Dr Alastair Webb is in receipt of an NIHR Biomedical Research Centre (Oxford) Clinical Fellowship. Prof. P.M. Rothwell is in receipt of an NIHR Senior Investigator award.

Disclosure: Author disclosures are provided at the end of the article.

英语语言的文献也包括。所有有关 $\beta$ 受体阻滞剂和安慰剂、其他抗高血压药物或其他 $\beta$ 受体阻滞剂的文献和联系网站都在参考文献中列出。以下是另外三种检索 $\beta$ 受体阻滞剂试验的方法：

检索 2007 年 5 月 1 日至 2010 年 5 月 1 日所有不包含荟萃分析的试验，检索词：(Trail) and ("blood-pressure lowering" or "antihypertensive" or "blood pressure lowering") and ("beta [-] blocker")。

检索日期从 1950 年至 2010 年 5 月 1 日，检索词：("Meta[-] analysis") and ("beta [-] blocker") and ("myocardial infarction")。

检索从 1950 年至 2010 年 5 月 1 日所有提及 $\beta$ 受体阻滞剂的词条，检索词：("Trail") and ("blood-pressure lowering" or "antihypertensive" or "blood pressure lowering") and ("specific  $\beta$ -blocker name")。

对于每一个符合我们入组标准的试验(附录 e-1: Table e-1, 见于 Neurology 网站 www.neurology.org), 我们对主要研究结果文章进行了回顾。从中提取了基线和所有随访时的血压的均值(SD), 以及心肌梗死和脑卒中的比例的相关数据。

### 统计分析

收缩压和舒张压在治疗人群之间的差异用方差变异比(VR)来替代评价个体之间差异<sup>[2]</sup>。使用 Mantel-Haenszel 方法的荟萃分析获得联合评估。根据 F 分布采用 95% 可信区间对数评估 VR 的方差。所有分析来自于每个试验使用的最高药物剂量组的随机选择, 在接近 1 年的随访的血压均值采用 VR 分析。

对 $\beta$ 受体阻滞剂和安慰剂, 不同级别抗高血压药或其他 $\beta$ 受体阻滞剂的比较中, 采用随机荟萃分析方法分析联合 VRs。所有的 VR 分析, 只有在随访时 SBP 均值差别在 $\leq 3$  mmHg 时, 才进行灵敏度分析。 $\beta$ 受体阻滞剂亚组包含 $\beta 1$ 受体阻滞剂、非选择性受体阻滞剂( $\beta 2$ 受体拮抗剂)、直接外周血管扩张剂、非血管扩张剂、高度水溶性、内拟交感神经活性剂, 这些分类都来自于 British National Formulary<sup>[10]</sup>, 已出版的文献或是先前报道的临床试验(附录 e-1: 表 e-2)。

虽然统计学不能显现出不同 $\beta$ 受体阻滞剂在血管事件中的作用差异, 但我们试着研究其作用是否与血压波动效果有一致性的趋势存在。对每个超过 100 例患者的治疗和至少 1 年随访的试验, 都计算了卒中和心肌梗死随机治疗风险的 OR 值。为分析 $\beta$ 受体阻滞剂亚型是否能有效防治卒中和心肌梗塞, 也比较了卒中和心肌梗塞的相对风险

值(rOR)。卒中和心肌梗塞的 OR 值和 rOR 值都一起用于分析每种 $\beta$ 受体阻滞剂和 $\beta$ 受体阻滞剂亚型与安慰剂或不同种类抗高血压药物的效果差别。

### 结果

我们一共查阅了 274 篇综述和荟萃分析资料(19 篇是关于在心梗后使用), 其中 68 篇是在排除患者人群中的重复试验文献或回顾试验。余下 206 篇荟萃分析产生了 1975 篇针对独立试验的引文。在 1372 项合理的高血压研究中, 我们挑出 94 篇试验文献, 报道中包含了 SBP 或 DBP 的基线均值和跟踪随访并将患者随机分配至某一 $\beta$ 受体阻滞剂, 其中 16 项试验随机化人群 $>100$  人, 使用 $\beta$ 受体阻滞剂超过 1 年, 并被报道出在随访期间出现心血管事件。在 90 项心梗后使用 $\beta$ 受体阻滞剂的试验中, 另有 5 项研究报道了卒中事件, 但其中 2 项因是急性研究而排除。辅助检索产生了另外 1318 篇摘要, 其中 222 篇进行了全文阅读, 据此我们又另外寻找出 35 项试验, 一共 129 项试验报道了 SBP 或 DBP 的均值(SD)基线和随访或卒中和心梗发生比例, 并且将患者随机分配至 $\beta$ 受体阻滞剂和安慰剂、其他抗高血压药物或其他类型 $\beta$ 受体阻滞剂(图 1)。

与其他药物种类相比, 随机化至任何一种 $\beta$ 受体阻滞剂能导致 VR 的增加(VR=1.14, 95% CI=1.06-1.23,  $P=0.001$ , 93 组比较, 50738 例患者), 尽管在 SBP 均值上差异很小(0.9 mmHg, 0.25-1.55)。在与安慰剂比较时, 虽然 SBP 均值显著下降, 但 VR 改变上没有统计学差异(VR=1.03, 0.89-1.19,  $P=0.37$ , 23 组比较, 17796 例患者, SBP 均值下降=10.2 mmHg, 8.3-12.0)。

在比较选择性 $\beta 1$ 受体阻滞剂与其他抗高血压药物时, 未发现其 VR 存在显著差异(VR=1.09, 1.00-1.19,  $P=0.053$ , 40746 例患者, 68 项试验), 总体 VR 的增加可能更多地归因于非选择性 $\beta$ 受体阻滞剂(VR=1.34, 1.13-1.59,  $P=0.002$ , 25 组比较, 9992 例患者); 亚组差异 $P=0.038$ (图 2)。直接比较不同 $\beta$ 受体阻滞剂, 相比其他非选择性受体阻滞剂, 随机分配至选择性 $\beta 1$ 受体阻滞剂的患者 SBP 波动更低(VR=0.81, 0.68-0.97,  $P=0.03$ , 954 例患者, 18 组比较), 尽管 SBP 的均值在非选择性受体阻滞剂药物中偏低(1.5 mmHg, 0.1-2.9, 图 3)。这些差异在分别比较每种其



图1 根据RISMA指南确认和挑选临床试验

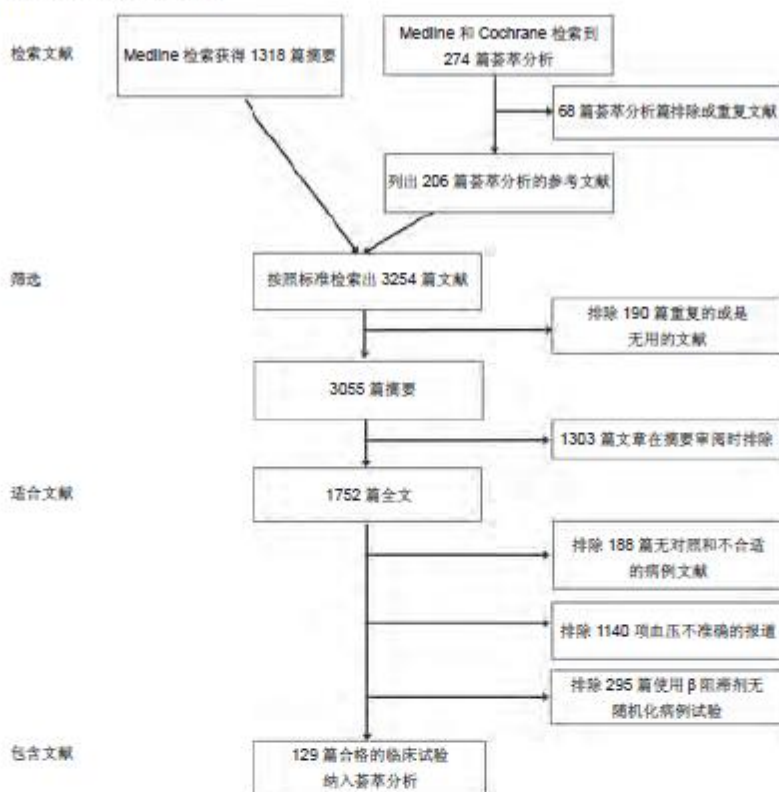

它药物亚组对于波动的作用时依然一致(图4), 包括在平均SBP方面未见显著差异的试验( $\beta$ 1选择性药物 VR=1.06, 0.95-1.17; 非选择性药物 VR=1.18, 0.98-1.42)。

如按经非抗 $\beta$ 受体的方式来作用来对药物进行分类, 这些临床试验中并未发现有明确的作用模式。 $\beta$ 受体阻滞剂通过抗 $\alpha$ 受体、 $\beta$ 2受体激动剂或是基于血管扩张的NO效应直接降低外周阻力, 使得其与其他药物相比时在VR方面没有显著的统计学差异(VR=0.96, 0.74-1.25, 778例患者, 13项试验), 而其他药物VR均明显升高(VR=1.16, 1.07-1.25, 49960例患者, 80组比较), 尽管在根据它们的 $\beta$ 受体选择型进行分类时其程度比看到的略低(附录e-1:图e-1)。然而, 在直接比较时, 减少外周阻力的 $\beta$ 受体阻滞剂与其它 $\beta$ 受体阻滞剂相比并未玄殊增加VR(VR=1.15, 0.96-1.39, P=0.1319, 1297

例患者, 19组比较), 这很大程度上是由于非选择性 $\beta$ 受体阻滞剂卡维地洛可增加VR(图3)。很少试验将患者随机化至具有内在拟交感活性作用的 $\beta$ 受体阻滞剂, 而高水溶性的 $\beta$ 受体阻滞剂与其他药物相比也无统计学差异(1.09, 0.97-1.23, P=0.13, 33994例患者, 41例试验; 附录e-1:图e-1)。

与其它药物类型相比, 心得安心得安是唯一一种能单独提高VR的药物(图2), 并且当其与另一种非选择性 $\beta$ 受体阻滞剂卡维地洛合用时, 与 $\beta$ 1受体阻滞剂相比, 可导致VR最大幅度的增加(附录e-1:图e-2)。最常见的与最低VR相关的药物为 $\beta$ 1受体阻滞剂奈必洛尔, 其VR值, 与其他药物、安慰剂和其他 $\beta$ 受体阻滞剂相比明显下降(图3)。

有10项初级和次级血管事件预防研究随机分配患者至 $\beta$ 1受体阻滞剂, 并报道了卒中的发病率, 大部分是将阿替洛尔或美托洛尔

图2 与其他抗高血压药物类型相比β受体阻滞剂的选择性对SBP变异性的作用

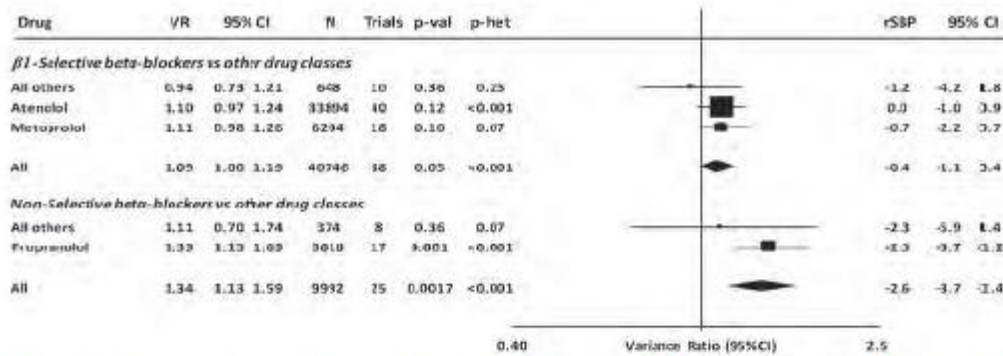

根据β受体阻滞剂的β1选择性,将每种β受体阻滞剂与所有其它抗高血压药物类型的试验内比较进行试验间的综合分析。随访时SBP变异性的评估通过变异率(VR)来表示。通过随机效应荟萃分析将VR和平均SBP的降低进行综合分析,并计算95%可信区间(CI)。Het=异质性;rSBP=平均SBP的降低。

与安慰剂或另一种药物比较。对于轻度高血压的Medical Research Council(MRC)研究<sup>[17]</sup>、高血压的International Prospective Primary Prevention Study研究<sup>[18]</sup>、以及2项心梗后研究<sup>[19,20]</sup>,这几项是仅有的将患者随机分配至非选择性β受体阻滞剂与安慰剂比较的试验,而MRC试验时也将患者随机分配至苯氟噻嗪。

与安慰剂比较,使用β1受体阻滞剂能降低20%的卒中风险(OR=0.80, 0.58-1.11, P=1791, 5项试验,附录e-1:图e-3),与非选择性β受体阻滞剂相比在卒中方面无变化(OR=0.98, 0.71-1.35, P=0.8822, 4项试验),虽然在两项大型初级预防试验中SBP的均值有显著的降低(SBP下降:IPPPSH 3.8

mmHg; MRC-轻度高血压10 mmHg)。与其他药物比较,使用β1受体阻滞剂会稍微增加卒中的风险(OR=1.24, 1.08-1.42, P=0.003, P-heterogeneity=0.2672, 7项试验),但在一项比较心得安与苯氟噻嗪的大型试验中(MRC-mild OR=2.29, 1.32-3.96, P=0.002)增加更加明显(差异P=0.03)。特别是,这一卒中风险的增加比在相似设计的MRC-老年人试验中更加明显,后者比较阿替洛尔和双氢克尿塞(OR=1.22, 0.82-1.82, P=0.37)。在所有的试验中,阿替洛尔与其他非β受体阻滞剂抗高血压药物相比会增加卒中的风险,但略低于心得安(附录e-1:图e-3)。β1受体阻滞剂与安慰剂或其他抗高血压药物相比,和心梗相

图3 与其他β受体阻滞剂相比β受体阻滞剂的选择性和扩血管作用对SBP变异性的作用

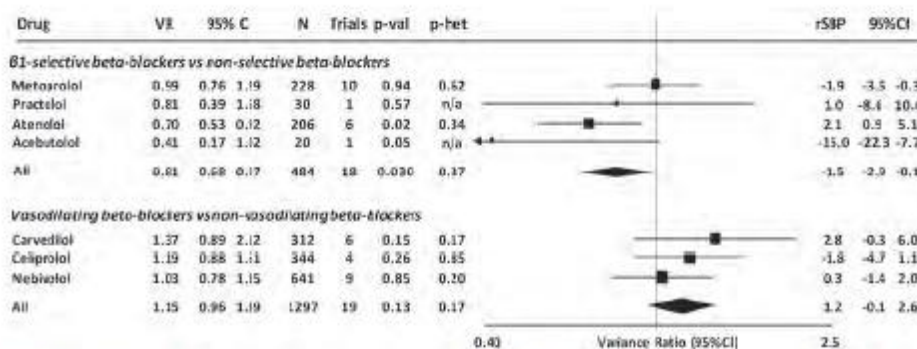

通过直接比较β1选择性和非选择性β受体阻滞剂或比较扩血管和非扩血管β受体阻滞剂,将试验内比较进行试验间的综合分析。随访时SBP变异性的评估通过变异率(VR)来表示。通过随机效应荟萃分析将VR和平均SBP的降低进行综合分析,并计算95%可信区间(CI)。Het=异质性;rSBP=平均SBP的降低。



图4 与各种抗高血压药物类型相比β受体阻滞剂的选择性对SBP变异性的作用

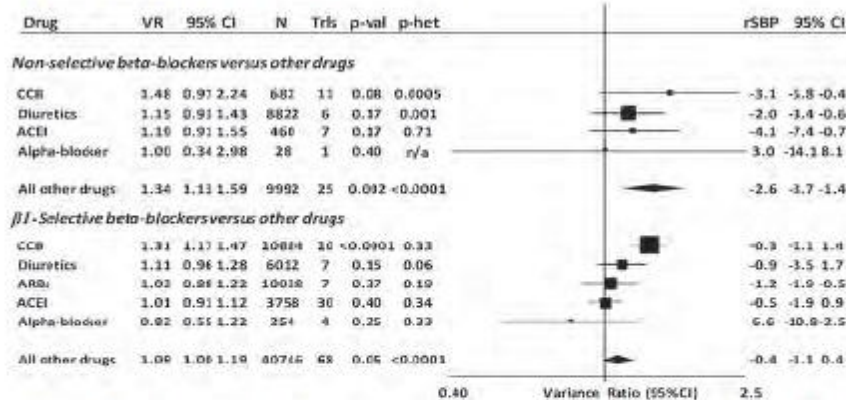

根据β受体阻滞剂的β1选择性,将各种β受体阻滞剂与各种其它抗高血压药物类型的试验内比较进行试验间的综合分析。随访时SBP变异性的评估通过变异率(VR)来表示。通过随机效应荟萃分析将VR和平均SBP的降低进行综合分析,并计算95%可信区间(CI)。Het-异质性;rSBP-平均SBP的降低。

比对于增加卒中发生的风险较小 ( $rOR=0.99$ ,  $0.82-1.19$ , 12项试验,  $P=0.90$ ), 但是对于非选择性β受体阻滞剂来说, 有风险增加的趋势 ( $rOR=1.50$ ,  $0.93-2.42$ , 5项试验,  $P=0.09$ ).

### 讨论

我们研究显示, 不论是采用直接与β1受体阻滞剂相比还是与其他抗高血压药物相比, 非选择性β受体阻滞剂能够增加SBP的波动性。我们还发现使用β受体阻滞剂与其他药物种类相比之所以会增加脑卒中的风险, 主要是由于使用非选择性β受体阻滞剂所致, 尤其与心肌梗塞的风险相比。

心得安是广泛用于治疗偏头痛兆和老年人的特发性震颤或焦虑, 但偏头痛会使卒中的风险加倍<sup>[22]</sup>。虽然在年轻偏头痛患者中发生率较低, 病例报告报道了心得安的使用和偏头痛卒中的潜在关系, 提示了心得安的使用和偏头痛和脑卒中的发生之间的时间关系<sup>[23,24]</sup>。特发性震颤在老年人中常见<sup>[25]</sup>, 其中许多老年人都有脑血管疾病史, 或伴随着年龄有脑卒发生的高风险<sup>[26,27]</sup>。因此, 在这些人群中使用心得安后SBP波动性的增加可能会伴随着卒中发生的风险增加。在目前的指南中推荐使用包含有美托洛尔的β1受体阻滞剂<sup>[11,12]</sup>治疗偏头痛, 阿替洛尔治疗原发性震颤<sup>[23]</sup>。我们的研究提示, 当这些患者群中卒中的风险增加时, 类似于上述β1受体阻滞剂应该优先于普奈洛尔被应用。

我们之前的研究证明, 在被诊断为有脑血管疾病史的患者中SBP波动性的增加是脑卒中风险一个特别强力的危险因素, 与其他抗高血压药物相比, β受体阻滞剂增加SBP的波动性和卒中风险<sup>[1-4]</sup>。随即带来的问题是, 如何对待需要β受体阻滞剂治疗心脏或血压疾病的TIA患者或是卒中患者。我们研究发现β1受体阻滞剂与相同程度的非选择性β受体阻滞剂相比, 并不会增加SBP波动性或卒中风险, 这会让那些有脑血管疾病需要β受体阻滞剂的患者稍感安慰。

我们研究也有一些局限性。首先SBP个体波动用个体间波动替代, 因为没有试验报道过个体波动。不过, 我们先前研究已显示SBP个体间的波动可以很好地替代测量个体的波动<sup>[2]</sup>, 抗高血压药物对个体波动性和个体间波动的作用相同<sup>[6]</sup>。其次, 只有IP-PPSH<sup>[18]</sup>和MRC-mild<sup>[17]</sup>试验报道了随机化使用非选择性药物卒中风险。不过, 许多试验中SBP波动测量包括直接与非选择性和β1受体阻滞剂相比的试验, 在以前就报道了与卒中的发生非常相关<sup>[1-4]</sup>。此外, IPPSSH<sup>[18]</sup>和MRC-mild<sup>[17]</sup>都是大型试验, 有足够的证据对卒中的风险评估, 并且在MRC-mild中对于心得安的卒中风险超过了其他所有β1受体阻滞剂的试验, 包括设计类似的比较阿替洛尔与噻嗪类药物的MRC-elderly试验。最后, 对于导致外周阻力直接下降的β受体阻滞剂的结论存在明显的矛盾, 在与其它抗高

血压药物相比时,其SBP波动的增加小于非血管扩张药物,但直接与非血管扩张 $\beta$ 受体阻滞剂相比时并无明显增加。然而这些结论可能受到卡维地洛和塞利洛尔的非选择性作用的混淆,这些药物会造成外周阻力下降,但会通过作用于 $\beta_2$ 受体阻滞剂而减弱内源性外周阻力的调控。奈比洛尔是选择性 $\beta_1$ 受体阻滞剂可造成NO依赖性外周阻力下降<sup>[2]</sup>,与其他药物或是 $\beta_1$ 受体阻滞剂相比一直与低VR相关。

这些结果与有一些SBP波动增加或是增加卒中风险情况的患者有关。BP的波动性和卒中的风险之间关系一直有<sup>[1,2]</sup>,还有与血压的均值关系亦然,因此血压收缩值的界限没有被界定过。BP波动性在统计学上也存在复杂问题(见附录e-2)。然而存在有一些即可的操作指示。第一,许多人以及有先前在家或在医院的血压测得值。那些有暂时高血压(例如超过160 mmHg)但是血压均值低于140 mmHg。一般不会常规诊断为高血压或是接受治疗。这些患者可能会需要一些降低血压波动性药物(如钙通道阻滞剂和噻嗪类)<sup>[1,4]</sup>,并且对于使用非选择性 $\beta$ 受体阻滞剂存在增加卒中的风险。其次,使用降压药的患者,与尽管有效控制SBP均值但仍有波动的患者都有卒中风险增加的可能<sup>[1]</sup>,这些人都会从使用钙通道阻滞剂或噻嗪类利尿剂中获益而稳定SBP<sup>[4]</sup>。

与其他抗高血压药物相比, $\beta$ 受体阻滞剂能增加血压的波动性,与卒中风险增加有关。然而,这些效果都是与非选择性 $\beta$ 受体阻滞剂有关的,因此对于卒中风险明显增加的患者应该避免使用。

## DISCLOSURE

Dr Webb has received an NIHR Biomedical Research Centre (Oxford) Clinical Fellowship. Dr Fletcher reports no disclosures. Prof. Rothwell serves on scientific advisory boards for Bayer Schering Plama, SERVIER, Pfizer Inc, and Biogen; has received funding for travel and speaker honoraria from sanofi-aventis, SERVIER, AstraZeneca and Bayer Schering Plama; and serves on the editorial boards of *Lancet Neurology*, *Stroke*, and *Cardiovascular Diabetology* and as Assistant Editor for the *International Journal of Stroke*.

## 参考文献

- Rothwell PM. Limitations of the usual BP hypothesis and importance of variability, instability, and episodic hypertension. *Lancet* 2010;375:938-948.
- Rothwell PM, Howard SC, Dolan E, et al. Prognostic significance of visit-to-visit variability, maximum systolic BP, and episodic hypertension. *Lancet* 2010;375:895-905.
- Rothwell PM, Howard SC, Dolan E, et al. ASCOT-BPLA and MRC Trial investigators. Effects of blockers and calcium-channel

- blockers on within-individual variability in BP and risk of stroke. *Lancet Neurol* 2010;9:469-480.
- Webb AJ, Fischer U, Mella Z, Rothwell PM. Effects of antihypertensive-drug class on interindividual variation in BP and risk of stroke: a systematic review and meta-analysis. *Lancet* 2010;375:906-915.
- Lindholm LH, Carlberg B, Samuelsson O. Should blockers remain first choice in the treatment of primary hypertension? A meta-analysis. *Lancet* 2005;366:1545-1553.
- Reiter MJ. Cardiovascular drug class specificity-blockers. *Prog Cardiovasc Dis* 2004;47:11-33.
- The -Blocker Pooling Project Research Group. The-Blocker Pooling Project (BBPP): subgroup findings from randomized trials in post infarction patients. *Eur Heart J* 1988;9:8-16.
- Preemantie N, Cleland J, Young P, Mason J, Harrison J. Blockade after myocardial infarction: systematic review and meta regression analysis. *BMJ* 1999;318:1730-1737.
- Heidenreich PA, McDonald KM, Hastie T, et al. Meta-analysis of trials comparing -blockers, calcium antagonists, and nitrates for stable angina. *JAMA* 1999;281:1927-1936.
- Fauchier L, Pierre B, deLabriolle A, Isaby D. Comparison of the beneficial effect of -blockers on mortality in patients with ischaemic or non-ischaemic systolic heart failure: a meta-analysis of randomised controlled trials. *Eur J Heart Fail* 2007;9:1136-1139.
- Evers S, Alfa J, Prese A, et al. EPNS guideline on the drug treatment of migraine: report of an EPNS task force. *Eur J Neurol* 2006;13:560-572.
- Silberstein SD, for the US Headache Consortium. Practice parameter: evidence-based guidelines for migraine headache (an evidence-based review). *Neurology* 2000;55:754-762.
- Zesiewicz TA, Eible R, Louis ED, et al. Practice parameter: therapies for essential tremor: report of the Quality Standards Subcommittee of the American Academy of Neurology. *Neurology* 2005;64:2008-2020.
- Slone J, Carson A, Duncan R, et al. Who is referred to neurology clinics? The diagnoses made in 3781 new patients. *Clin Neurol Neurosurg* 2010;112:747-751.
- Thamvi B, Lo N, Robinson T. Essential tremor: the most common movement disorder in older people. *Age Ageing* 2006;35:344-349.
- British National Formulary 60. London: BMJ Publishing and RPS Publishing; 2010.
- Medical Research Council Working Party. MRC trial of treatment of mild hypertension: principal results. *BMJ* 1985;291:97-104.
- The IPPISH Collaborative Group et al. Cardiovascular risk and risk factors in a randomized trial of treatment based on the -blocker nifedipine: The International Prospective Primary Prevention Study in Hypertension (IPPSH). *J Hypertension* 1985;3:379-392.
- Timolol-induced reduction in mortality and reinfarction in patients surviving acute myocardial infarction. *N Engl J Med* 1981;304:801-807.
- The effect of pindolol on the two years mortality after complicated myocardial infarction. *Eur Heart J* 1983;4:367-375.
- MRC Working Party. Medical Research Council trial of treatment of hypertension in older adults: principal results. *BMJ* 1992;304:405-412.
- Scharke M, Risti PM, Elgal ME, Buring JP, Lipton RB, Karth T. Migraine and cardiovascular disease: systematic review and meta-analysis. *BMJ* 2009;339:h3914.
- Alvarez Sabin J, Molinas A, Taron A, Titus F, Codina A. [Migraine-infarct in patients treated with -blockers.] *Rev Clin Esp* 1993;192:228-230.
- Mendizabal JE, Greiner F, Hamilton DO, Rothrock JF. Migraineous stroke causing thalamic infarction and amnesia during treatment with propranolol. *Headache* 1997;37:594-596.
- Bartwell A, Trull JA. Stroke in migraine as a consequence of propranolol. *Headache* 1987;27:381-383.
- Rothwell PM, Coull AJ, Giles MF, et al. Change in stroke incidence, mortality, case-fatality, severity and risk factors in Oxfordshire, UK from 1981 to 2004 (Oxford Vascular Study). *Lancet* 2004;363:1925-1933.
- Rothwell PM, Giles MF, Flossman P, et al. A simple score (ABCID) to identify individuals at high early risk of stroke after transient ischaemic attack. *Lancet* 2005;366:29-36.
- Van Bortel LM, Fici F, Mascagni F. Efficacy and tolerability of nebivolol compared with other antihypertensive drugs: a meta-analysis. *Am J Cardiovasc Drugs* 2008;8:35-44.
